# Supplementary material for: Inborn errors of metabolism and the human interactome: a systems medicine approach
Source: J Inherit Metab Dis. 2018 Feb 5;41(3):285–96. doi: 10.1007/s10545-018-0140-0 (PMC5959957; doi:10.1007/s10545-018-0140-0)
Supplement: Supplementary file 1 — (XLSX 63 kb) [file 10545_2018_140_MOESM1_ESM.xlsx]

## Sheet: Blatt1
Genes associated with an IEM
Symbol	Gene Name	IEM disease group	Entrez Gene Id	MIM number
AASS	aminoadipate-semialdehyde synthase	Disorders of amino acid and peptide metabolism	10157	605113
ACAD8	acyl-CoA dehydrogenase family member 8	Disorders of amino acid and peptide metabolism	27034	604773
ACADSB	acyl-CoA dehydrogenase, short/branched chain	Disorders of amino acid and peptide metabolism	36	600301
ACAT1	acetyl-CoA acetyltransferase 1	Disorders of amino acid and peptide metabolism	38	607809
ACY1	aminoacylase 1	Disorders of amino acid and peptide metabolism	95	104620
AHCY	adenosylhomocysteinase	Disorders of amino acid and peptide metabolism	191	180960
ALDH18A1	aldehyde dehydrogenase 18 family member A1	Disorders of amino acid and peptide metabolism	5832	138250
ALDH4A1	aldehyde dehydrogenase 4 family member A1	Disorders of amino acid and peptide metabolism	8659	606811
ALDH6A1	aldehyde dehydrogenase 6 family member A1	Disorders of amino acid and peptide metabolism	4329	603178
AMT	aminomethyltransferase	Disorders of amino acid and peptide metabolism	275	238310
ARG1	arginase 1	Disorders of amino acid and peptide metabolism	383	608313
ASL	argininosuccinate lyase	Disorders of amino acid and peptide metabolism	435	608310
ASPA	aspartoacylase	Disorders of amino acid and peptide metabolism	443	608034
ASS1	argininosuccinate synthase 1	Disorders of amino acid and peptide metabolism	445	603470
AUH	AU RNA binding methylglutaconyl-CoA hydratase	Disorders of amino acid and peptide metabolism	549	600529
BCKDHB	branched chain keto acid dehydrogenase E1 subunit beta	Disorders of amino acid and peptide metabolism	594	248611
CPS1	carbamoyl-phosphate synthase 1	Disorders of amino acid and peptide metabolism	1373	608307
CTH	cystathionine gamma-lyase	Disorders of amino acid and peptide metabolism	1491	607657
D2HGDH	D-2-hydroxyglutarate dehydrogenase	Disorders of amino acid and peptide metabolism	728294	609186
DBT	dihydrolipoamide branched chain transacylase E2	Disorders of amino acid and peptide metabolism	1629	248610
DHTKD1	dehydrogenase E1 and transketolase domain containing 1	Disorders of amino acid and peptide metabolism	55526	614984
DNAJC19	DnaJ heat shock protein family (Hsp40) member C19	Disorders of amino acid and peptide metabolism	131118	608977
FAH	fumarylacetoacetate hydrolase	Disorders of amino acid and peptide metabolism	2184	613871
FTCD	formimidoyltransferase cyclodeaminase	Disorders of amino acid and peptide metabolism	10841	606806
GCDH	glutaryl-CoA dehydrogenase	Disorders of amino acid and peptide metabolism	2639	608801
GCLC	glutamate-cysteine ligase catalytic subunit	Disorders of amino acid and peptide metabolism	2729	606857
GCSH	glycine cleavage system protein H	Disorders of amino acid and peptide metabolism	2653	238330
GGT1	gamma-glutamyltransferase 1	Disorders of amino acid and peptide metabolism	2678	612346
GLDC	glycine decarboxylase	Disorders of amino acid and peptide metabolism	2731	238300
GLUD1	glutamate dehydrogenase 1	Disorders of amino acid and peptide metabolism	2746	138130
GLUL	glutamate-ammonia ligase	Disorders of amino acid and peptide metabolism	2752	138290
GLYCTK	glycerate kinase	Disorders of amino acid and peptide metabolism	132158	610516
GNMT	glycine N-methyltransferase	Disorders of amino acid and peptide metabolism	27232	606628
GSS	glutathione synthetase	Disorders of amino acid and peptide metabolism	2937	601002
HAL	histidine ammonia-lyase	Disorders of amino acid and peptide metabolism	3034	609457
HGD	homogentisate 1,2-dioxygenase	Disorders of amino acid and peptide metabolism	3081	607474
HIBCH	3-hydroxyisobutyryl-CoA hydrolase	Disorders of amino acid and peptide metabolism	26275	610690
HMGCL	3-hydroxymethyl-3-methylglutaryl-CoA lyase	Disorders of amino acid and peptide metabolism	3155	613898
HPD	4-hydroxyphenylpyruvate dioxygenase	Disorders of amino acid and peptide metabolism	3242	609695
HSD17B10	hydroxysteroid 17-beta dehydrogenase 10	Disorders of amino acid and peptide metabolism	3028	300256
IDH1	isocitrate dehydrogenase (NADP(+)) 1, cytosolic	Disorders of amino acid and peptide metabolism	3417	147700
IDH2	isocitrate dehydrogenase (NADP(+)) 2, mitochondrial	Disorders of amino acid and peptide metabolism	3418	147650
IVD	isovaleryl-CoA dehydrogenase	Disorders of amino acid and peptide metabolism	3712	607036
L2HGDH	L-2-hydroxyglutarate dehydrogenase	Disorders of amino acid and peptide metabolism	79944	609584
MAT1A	methionine adenosyltransferase 1A	Disorders of amino acid and peptide metabolism	4143	610550
MCCC1	methylcrotonoyl-CoA carboxylase 1	Disorders of amino acid and peptide metabolism	56922	609010
MCEE	methylmalonyl-CoA epimerase	Disorders of amino acid and peptide metabolism	84693	608419
MTR	5-methyltetrahydrofolate-homocysteine methyltransferase	Disorders of amino acid and peptide metabolism	4548	156570
MTRR	5-methyltetrahydrofolate-homocysteine methyltransferase reductase	Disorders of amino acid and peptide metabolism	4552	602568
MUT	methylmalonyl-CoA mutase	Disorders of amino acid and peptide metabolism	4594	609058
NAGS	N-acetylglutamate synthase	Disorders of amino acid and peptide metabolism	162417	608300
OCRL	OCRL, inositol polyphosphate-5-phosphatase	Disorders of amino acid and peptide metabolism	4952	300535
OPA3	OPA3, outer mitochondrial membrane lipid metabolism regulator	Disorders of amino acid and peptide metabolism	80207	606580
OPLAH	5-oxoprolinase (ATP-hydrolysing)	Disorders of amino acid and peptide metabolism	26873	614243
OTC	ornithine carbamoyltransferase	Disorders of amino acid and peptide metabolism	5009	300461
PAH	phenylalanine hydroxylase	Disorders of amino acid and peptide metabolism	5053	612349
PCCA	propionyl-CoA carboxylase alpha subunit	Disorders of amino acid and peptide metabolism	5095	232000
PCCB	propionyl-CoA carboxylase beta subunit	Disorders of amino acid and peptide metabolism	5096	232050
PEPD	peptidase D	Disorders of amino acid and peptide metabolism	5184	613230
PHGDH	phosphoglycerate dehydrogenase	Disorders of amino acid and peptide metabolism	26227	606879
PRODH	proline dehydrogenase 1	Disorders of amino acid and peptide metabolism	5625	606810
PSAT1	phosphoserine aminotransferase 1	Disorders of amino acid and peptide metabolism	29968	610936
PYCR1	pyrroline-5-carboxylate reductase 1	Disorders of amino acid and peptide metabolism	5831	179035
SARDH	sarcosine dehydrogenase	Disorders of amino acid and peptide metabolism	1757	604455
SLC25A13	solute carrier family 25 member 13	Disorders of amino acid and peptide metabolism	10165	603859
SLC25A15	solute carrier family 25 member 15	Disorders of amino acid and peptide metabolism	10166	603861
SLC36A2	solute carrier family 36 member 2	Disorders of amino acid and peptide metabolism	153201	608331
SLC6A19	solute carrier family 6 member 19	Disorders of amino acid and peptide metabolism	340024	608893
SLC6A20	solute carrier family 6 member 20	Disorders of amino acid and peptide metabolism	54716	605616
SLC7A7	solute carrier family 7 member 7	Disorders of amino acid and peptide metabolism	9056	603593
SLC7A9	solute carrier family 7 member 9	Disorders of amino acid and peptide metabolism	11136	604144
SUOX	sulfite oxidase	Disorders of amino acid and peptide metabolism	6821	606887
TAT	tyrosine aminotransferase	Disorders of amino acid and peptide metabolism	6898	613018
TAZ	tafazzin	Disorders of amino acid and peptide metabolism	6901	300394
UROC1	urocanate hydratase 1	Disorders of amino acid and peptide metabolism	131669	613012
AGL	amylo-alpha-1, 6-glucosidase, 4-alpha-glucanotransferase	Disorders of carbohydrate metabolism	178	610860
ALDOA	aldolase, fructose-bisphosphate A	Disorders of carbohydrate metabolism	226	103850
ALDOB	aldolase, fructose-bisphosphate B	Disorders of carbohydrate metabolism	229	612724
DCXR	dicarbonyl and L-xylulose reductase	Disorders of carbohydrate metabolism	51181	608347
ENO3	enolase 3	Disorders of carbohydrate metabolism	2027	131370
FBP1	fructose-bisphosphatase 1	Disorders of carbohydrate metabolism	2203	611570
G6PC	glucose-6-phosphatase catalytic subunit	Disorders of carbohydrate metabolism	2538	613742
GAA	glucosidase alpha, acid	Disorders of carbohydrate metabolism	2548	606800
GALE	UDP-galactose-4-epimerase	Disorders of carbohydrate metabolism	2582	606953
GALK1	galactokinase 1	Disorders of carbohydrate metabolism	2584	604313
GALT	galactose-1-phosphate uridylyltransferase	Disorders of carbohydrate metabolism	2592	606999
GBE1	1,4-alpha-glucan branching enzyme 1	Disorders of carbohydrate metabolism	2632	607839
GK	glycerol kinase	Disorders of carbohydrate metabolism	2710	300474
GRHPR	glyoxylate and hydroxypyruvate reductase	Disorders of carbohydrate metabolism	9380	604296
GYS1	glycogen synthase 1	Disorders of carbohydrate metabolism	2997	138570
GYS2	glycogen synthase 2	Disorders of carbohydrate metabolism	2998	138571
KHK	ketohexokinase	Disorders of carbohydrate metabolism	3795	614058
LCT	lactase	Disorders of carbohydrate metabolism	3938	603202
LDHA	lactate dehydrogenase A	Disorders of carbohydrate metabolism	3939	150000
PC	pyruvate carboxylase	Disorders of carbohydrate metabolism	5091	608786
PCK2	phosphoenolpyruvate carboxykinase 2, mitochondrial	Disorders of carbohydrate metabolism	5106	614095
PFKM	phosphofructokinase, muscle	Disorders of carbohydrate metabolism	5213	610681
PGAM2	phosphoglycerate mutase 2	Disorders of carbohydrate metabolism	5224	612931
PGK1	phosphoglycerate kinase 1	Disorders of carbohydrate metabolism	5230	311800
PGM1	phosphoglucomutase 1	Disorders of carbohydrate metabolism	5236	171900
PHKA1	phosphorylase kinase regulatory subunit alpha 1	Disorders of carbohydrate metabolism	5255	311870
PHKA2	phosphorylase kinase regulatory subunit alpha 2	Disorders of carbohydrate metabolism	5256	300798
PHKB	phosphorylase kinase regulatory subunit beta	Disorders of carbohydrate metabolism	5257	172490
PRKAG2	protein kinase AMP-activated non-catalytic subunit gamma 2	Disorders of carbohydrate metabolism	51422	602743
PYGL	glycogen phosphorylase L	Disorders of carbohydrate metabolism	5836	613741
PYGM	glycogen phosphorylase, muscle associated	Disorders of carbohydrate metabolism	5837	608455
RPIA	ribose 5-phosphate isomerase A	Disorders of carbohydrate metabolism	22934	180430
SI	sucrase-isomaltase	Disorders of carbohydrate metabolism	6476	609845
SLC2A1	solute carrier family 2 member 1	Disorders of carbohydrate metabolism	6513	138140;14309
SLC2A2	solute carrier family 2 member 2	Disorders of carbohydrate metabolism	6514	138160
SLC37A4	solute carrier family 37 member 4	Disorders of carbohydrate metabolism	2542	602671
SLC5A1	solute carrier family 5 member 1	Disorders of carbohydrate metabolism	6523	182380
TALDO1	transaldolase 1	Disorders of carbohydrate metabolism	6888	602063
TREH	trehalase	Disorders of carbohydrate metabolism	11181	275360
ACADM	acyl-CoA dehydrogenase, C-4 to C-12 straight chain	Disorders of fatty acid and ketone body metabolism	34	607008
ACADS	acyl-CoA dehydrogenase, C-2 to C-3 short chain	Disorders of fatty acid and ketone body metabolism	35	606885
ACADVL	acyl-CoA dehydrogenase, very long chain	Disorders of fatty acid and ketone body metabolism	37	609575
ACAT2	acetyl-CoA acetyltransferase 2	Disorders of fatty acid and ketone body metabolism	39	100678
CPT1A	carnitine palmitoyltransferase 1A	Disorders of fatty acid and ketone body metabolism	1374	600528
CPT2	carnitine palmitoyltransferase 2	Disorders of fatty acid and ketone body metabolism	1376	600650
ETFA	electron transfer flavoprotein alpha subunit	Disorders of fatty acid and ketone body metabolism	2108	608053
ETFB	electron transfer flavoprotein beta subunit	Disorders of fatty acid and ketone body metabolism	2109	130410
ETFDH	electron transfer flavoprotein dehydrogenase	Disorders of fatty acid and ketone body metabolism	2110	231675
HADHB	hydroxyacyl-CoA dehydrogenase/3-ketoacyl-CoA thiolase/enoyl-CoA hydratase (trifunctional protein), beta subunit	Disorders of fatty acid and ketone body metabolism	3032	143450
HMGCS2	3-hydroxy-3-methylglutaryl-CoA synthase 2	Disorders of fatty acid and ketone body metabolism	3158	600234
MLYCD	malonyl-CoA decarboxylase	Disorders of fatty acid and ketone body metabolism	23417	606761
OXCT1	3-oxoacid CoA-transferase 1	Disorders of fatty acid and ketone body metabolism	5019	601424
SLC22A5	solute carrier family 22 member 5	Disorders of fatty acid and ketone body metabolism	6584	603377
SLC25A20	solute carrier family 25 member 20	Disorders of fatty acid and ketone body metabolism	788	613698
ABCB7	ATP binding cassette subfamily B member 7	Disorders of energy metabolism	22	300135
ACAD9	acyl-CoA dehydrogenase family member 9	Disorders of energy metabolism	28976	611103
AIFM1	apoptosis inducing factor mitochondria associated 1	Disorders of energy metabolism	9131	300169
APOPT1	apoptogenic 1, mitochondrial	Disorders of energy metabolism	84334	616003
ATPAF2	ATP synthase mitochondrial F1 complex assembly factor 2	Disorders of energy metabolism	91647	608918
BCKDHA	branched chain keto acid dehydrogenase E1, alpha polypeptide	Disorders of energy metabolism	593	608348
BCS1L	BCS1 homolog, ubiquinol-cytochrome c reductase complex chaperone	Disorders of energy metabolism	617	603647
C12orf65	chromosome 12 open reading frame 65	Disorders of energy metabolism	91574	613541
COA5	cytochrome c oxidase assembly factor 5	Disorders of energy metabolism	493753	613920
COQ2	coenzyme Q2, polyprenyltransferase	Disorders of energy metabolism	27235	609825
COX10	COX10, heme A:farnesyltransferase cytochrome c oxidase assembly factor	Disorders of energy metabolism	1352	602125
COX14	COX14, cytochrome c oxidase assembly factor	Disorders of energy metabolism	84987	614478
COX15	COX15, cytochrome c oxidase assembly homolog	Disorders of energy metabolism	1355	603646
COX20	COX20, cytochrome c oxidase assembly factor	Disorders of energy metabolism	116228	614698
COX6B1	cytochrome c oxidase subunit 6B1	Disorders of energy metabolism	1340	124089
DARS2	aspartyl-tRNA synthetase 2, mitochondrial	Disorders of energy metabolism	55157	610956
DLAT	dihydrolipoamide S-acetyltransferase	Disorders of energy metabolism	1737	608770
ETHE1	ETHE1, persulfide dioxygenase	Disorders of energy metabolism	23474	608451
FASTKD2	FAST kinase domains 2	Disorders of energy metabolism	22868	612322
FH	fumarate hydratase	Disorders of energy metabolism	2271	136850
FOXRED1	FAD dependent oxidoreductase domain containing 1	Disorders of energy metabolism	55572	613622
GAMT	guanidinoacetate N-methyltransferase	Disorders of energy metabolism	2593	601240
GATM	glycine amidinotransferase	Disorders of energy metabolism	2628	602360
GFM1	G elongation factor mitochondrial 1	Disorders of energy metabolism	85476	606639
ISCU	iron-sulfur cluster assembly enzyme	Disorders of energy metabolism	23479	611911
LRPPRC	leucine rich pentatricopeptide repeat containing	Disorders of energy metabolism	10128	607544
MRPS16	mitochondrial ribosomal protein S16	Disorders of energy metabolism	51021	609204
MRPS22	mitochondrial ribosomal protein S22	Disorders of energy metabolism	56945	605810
NDUFA1	NADH:ubiquinone oxidoreductase subunit A1	Disorders of energy metabolism	4694	300078
NDUFA10	NADH:ubiquinone oxidoreductase subunit A10	Disorders of energy metabolism	4705	603835
NDUFA11	NADH:ubiquinone oxidoreductase subunit A11	Disorders of energy metabolism	126328	612638
NDUFA12	NADH:ubiquinone oxidoreductase subunit A12	Disorders of energy metabolism	55967	614530
NDUFA2	NADH:ubiquinone oxidoreductase subunit A2	Disorders of energy metabolism	4695	602137
NDUFA9	NADH:ubiquinone oxidoreductase subunit A9	Disorders of energy metabolism	4704	603834
NDUFAF1	NADH:ubiquinone oxidoreductase complex assembly factor 1	Disorders of energy metabolism	51103	606934
NDUFAF2	NADH:ubiquinone oxidoreductase complex assembly factor 2	Disorders of energy metabolism	91942	609653
NDUFAF3	NADH:ubiquinone oxidoreductase complex assembly factor 3	Disorders of energy metabolism	25915	612911
NDUFAF4	NADH:ubiquinone oxidoreductase complex assembly factor 4	Disorders of energy metabolism	29078	611776
NDUFAF5	NADH:ubiquinone oxidoreductase complex assembly factor 5	Disorders of energy metabolism	79133	612360
NDUFAF6	NADH:ubiquinone oxidoreductase complex assembly factor 6	Disorders of energy metabolism	137682	612392
NDUFB3	NADH:ubiquinone oxidoreductase subunit B3	Disorders of energy metabolism	4709	603839
NDUFB9	NADH:ubiquinone oxidoreductase subunit B9	Disorders of energy metabolism	4715	601445
NDUFS1	NADH:ubiquinone oxidoreductase core subunit S1	Disorders of energy metabolism	4719	157655
NDUFS2	NADH:ubiquinone oxidoreductase core subunit S2	Disorders of energy metabolism	4720	602985
NDUFS3	NADH:ubiquinone oxidoreductase core subunit S3	Disorders of energy metabolism	4722	603846
NDUFS4	NADH:ubiquinone oxidoreductase subunit S4	Disorders of energy metabolism	4724	602694
NDUFS6	NADH:ubiquinone oxidoreductase subunit S6	Disorders of energy metabolism	4726	603848
NDUFS7	NADH:ubiquinone oxidoreductase core subunit S7	Disorders of energy metabolism	374291	601825
NDUFS8	NADH:ubiquinone oxidoreductase core subunit S8	Disorders of energy metabolism	4728	602141
NDUFV1	NADH:ubiquinone oxidoreductase core subunit V1	Disorders of energy metabolism	4723	161015
NDUFV2	NADH:ubiquinone oxidoreductase core subunit V2	Disorders of energy metabolism	4729	600532
NUBPL	nucleotide binding protein like	Disorders of energy metabolism	80224	613621
OGDH	oxoglutarate dehydrogenase	Disorders of energy metabolism	4967	613022
OPA1	OPA1, mitochondrial dynamin like GTPase	Disorders of energy metabolism	4976	605290
PDHA1	pyruvate dehydrogenase (lipoamide) alpha 1	Disorders of energy metabolism	5160	300502
PDHB	pyruvate dehydrogenase (lipoamide) beta	Disorders of energy metabolism	5162	179060
PDP1	pyruvate dehyrogenase phosphatase catalytic subunit 1	Disorders of energy metabolism	54704	605993
PDX1	pancreatic and duodenal homeobox 1	Disorders of energy metabolism	3651	600733
PKLR	pyruvate kinase, liver and RBC	Disorders of energy metabolism	5313	609712
POLG	DNA polymerase gamma, catalytic subunit	Disorders of energy metabolism	5428	174763
POLG2	DNA polymerase gamma 2, accessory subunit	Disorders of energy metabolism	11232	604983
PUS1	pseudouridylate synthase 1	Disorders of energy metabolism	80324	608109
RARS2	arginyl-tRNA synthetase 2, mitochondrial	Disorders of energy metabolism	57038	611524
SDHA	succinate dehydrogenase complex flavoprotein subunit A	Disorders of energy metabolism	6389	600857
SDHAF1	succinate dehydrogenase complex assembly factor 1	Disorders of energy metabolism	644096	612848
SLC25A12	solute carrier family 25 member 12	Disorders of energy metabolism	8604	603667
SLC25A22	solute carrier family 25 member 22	Disorders of energy metabolism	79751	609302
SLC25A3	solute carrier family 25 member 3	Disorders of energy metabolism	5250	600370
SLC25A38	solute carrier family 25 member 38	Disorders of energy metabolism	54977	610819
SLC25A4	solute carrier family 25 member 4	Disorders of energy metabolism	291	103220
SLC6A8	solute carrier family 6 member 8	Disorders of energy metabolism	6535	300036
SUCLA2	succinate-CoA ligase ADP-forming beta subunit	Disorders of energy metabolism	8803	603921
SUCLG1	succinate-CoA ligase alpha subunit	Disorders of energy metabolism	8802	611224
SURF1	SURF1, cytochrome c oxidase assembly factor	Disorders of energy metabolism	6834	185620
TIMM8A	translocase of inner mitochondrial membrane 8A	Disorders of energy metabolism	1678	300356
TRMU	tRNA 5-methylaminomethyl-2-thiouridylate methyltransferase	Disorders of energy metabolism	55687	610230
TSFM	Ts translation elongation factor, mitochondrial	Disorders of energy metabolism	10102	604723
TUFM	Tu translation elongation factor, mitochondrial	Disorders of energy metabolism	7284	602389
TWNK	twinkle mtDNA helicase	Disorders of energy metabolism	56652	606075
YARS2	tyrosyl-tRNA synthetase 2	Disorders of energy metabolism	51067	610957
ABCG2	ATP binding cassette subfamily G member 2 (Junior blood group)	Disorders in the metabolism of purines, pyrimidines and nucleotides	9429	603756
ADA	adenosine deaminase	Disorders in the metabolism of purines, pyrimidines and nucleotides	100	608958
ADSL	adenylosuccinate lyase	Disorders in the metabolism of purines, pyrimidines and nucleotides	158	608222
AMPD1	adenosine monophosphate deaminase 1	Disorders in the metabolism of purines, pyrimidines and nucleotides	270	102770
APRT	adenine phosphoribosyltransferase	Disorders in the metabolism of purines, pyrimidines and nucleotides	353	102600
ATIC	5-aminoimidazole-4-carboxamide ribonucleotide formyltransferase/IMP cyclohydrolase	Disorders in the metabolism of purines, pyrimidines and nucleotides	471	601731
DGUOK	deoxyguanosine kinase	Disorders in the metabolism of purines, pyrimidines and nucleotides	1716	601465
DHODH	dihydroorotate dehydrogenase (quinone)	Disorders in the metabolism of purines, pyrimidines and nucleotides	1723	126064
DPYD	dihydropyrimidine dehydrogenase	Disorders in the metabolism of purines, pyrimidines and nucleotides	1806	612779
DPYS	dihydropyrimidinase	Disorders in the metabolism of purines, pyrimidines and nucleotides	1807	613326
HPRT1	hypoxanthine phosphoribosyltransferase 1	Disorders in the metabolism of purines, pyrimidines and nucleotides	3251	308000
ITPA	inosine triphosphatase	Disorders in the metabolism of purines, pyrimidines and nucleotides	3704	147520
NT5C3A	5'-nucleotidase, cytosolic IIIA	Disorders in the metabolism of purines, pyrimidines and nucleotides	51251	606224
PNP	purine nucleoside phosphorylase	Disorders in the metabolism of purines, pyrimidines and nucleotides	4860	164050
PRPS1	phosphoribosyl pyrophosphate synthetase 1	Disorders in the metabolism of purines, pyrimidines and nucleotides	5631	311850
RNASEH2B	ribonuclease H2 subunit B	Disorders in the metabolism of purines, pyrimidines and nucleotides	79621	610326
RNASET2	ribonuclease T2	Disorders in the metabolism of purines, pyrimidines and nucleotides	8635	612944
RRM2B	ribonucleotide reductase regulatory TP53 inducible subunit M2B	Disorders in the metabolism of purines, pyrimidines and nucleotides	50484	604712
SAMHD1	SAM and HD domain containing deoxynucleoside triphosphate triphosphohydrolase 1	Disorders in the metabolism of purines, pyrimidines and nucleotides	25939	606754
TK2	thymidine kinase 2, mitochondrial	Disorders in the metabolism of purines, pyrimidines and nucleotides	7084	188250
TPMT	thiopurine S-methyltransferase	Disorders in the metabolism of purines, pyrimidines and nucleotides	7172	187680
TREX1	three prime repair exonuclease 1	Disorders in the metabolism of purines, pyrimidines and nucleotides	11277	606609
TYMP	thymidine phosphorylase	Disorders in the metabolism of purines, pyrimidines and nucleotides	1890	131222
UMOD	uromodulin	Disorders in the metabolism of purines, pyrimidines and nucleotides	7369	191845
UMPS	uridine monophosphate synthetase	Disorders in the metabolism of purines, pyrimidines and nucleotides	7372	613891
UPB1	beta-ureidopropionase 1	Disorders in the metabolism of purines, pyrimidines and nucleotides	51733	606673
XDH	xanthine dehydrogenase	Disorders in the metabolism of purines, pyrimidines and nucleotides	7498	607633
ABCB11	ATP binding cassette subfamily B member 11	Disorders of the metabolism of sterols	8647	603201
ABCB4	ATP binding cassette subfamily B member 4	Disorders of the metabolism of sterols	5244	171060
ABCD3	ATP binding cassette subfamily D member 3	Disorders of the metabolism of sterols	5825	170995
ATP8B1	ATPase phospholipid transporting 8B1	Disorders of the metabolism of sterols	5205	602397
CYP27A1	cytochrome P450 family 27 subfamily A member 1	Disorders of the metabolism of sterols	1593	606530
DHCR24	24-dehydrocholesterol reductase	Disorders of the metabolism of sterols	1718	606418
DHCR7	7-dehydrocholesterol reductase	Disorders of the metabolism of sterols	1717	602858
EBP	emopamil binding protein (sterol isomerase)	Disorders of the metabolism of sterols	10682	300205
LBR	lamin B receptor	Disorders of the metabolism of sterols	3930	600024
MVK	mevalonate kinase	Disorders of the metabolism of sterols	4598	251170
NSDHL	NAD(P) dependent steroid dehydrogenase-like	Disorders of the metabolism of sterols	50814	300275
STS	steroid sulfatase	Disorders of the metabolism of sterols	412	300747
ALAD	aminolevulinate dehydratase	Disorders of porphyrin and haem metabolism	210	125270
ALAS2	5'-aminolevulinate synthase 2	Disorders of porphyrin and haem metabolism	212	301300
CPOX	coproporphyrinogen oxidase	Disorders of porphyrin and haem metabolism	1371	612732
FECH	ferrochelatase	Disorders of porphyrin and haem metabolism	2235	612386
HFE	hemochromatosis	Disorders of porphyrin and haem metabolism	3077	613609
HMBS	hydroxymethylbilane synthase	Disorders of porphyrin and haem metabolism	3145	609806
PPOX	protoporphyrinogen oxidase	Disorders of porphyrin and haem metabolism	5498	600923
SEC23B	Sec23 homolog B, coat complex II component	Disorders of porphyrin and haem metabolism	10483	610512
UROD	uroporphyrinogen decarboxylase	Disorders of porphyrin and haem metabolism	7389	613521
UROS	uroporphyrinogen III synthase	Disorders of porphyrin and haem metabolism	7390	606938
ABCA1	ATP binding cassette subfamily A member 1	Disorders of lipid and lipoprotein metabolism	19	600046
ABCG5	ATP binding cassette subfamily G member 5	Disorders of lipid and lipoprotein metabolism	64240	605459
ABCG8	ATP binding cassette subfamily G member 8	Disorders of lipid and lipoprotein metabolism	64241	605460
ALDH3A2	aldehyde dehydrogenase 3 family member A2	Disorders of lipid and lipoprotein metabolism	224	609523
APOA1	apolipoprotein A1	Disorders of lipid and lipoprotein metabolism	335	107680
APOA2	apolipoprotein A2	Disorders of lipid and lipoprotein metabolism	336	107670
APOB	apolipoprotein B	Disorders of lipid and lipoprotein metabolism	338	107730
APOC2	apolipoprotein C2	Disorders of lipid and lipoprotein metabolism	344	608083
APOE	apolipoprotein E	Disorders of lipid and lipoprotein metabolism	348	107741
CETP	cholesteryl ester transfer protein	Disorders of lipid and lipoprotein metabolism	1071	118470
CLPS	colipase	Disorders of lipid and lipoprotein metabolism	1208	120105
EPHX2	epoxide hydrolase 2	Disorders of lipid and lipoprotein metabolism	2053	132811
GHR	growth hormone receptor	Disorders of lipid and lipoprotein metabolism	2690	600946
LCAT	lecithin-cholesterol acyltransferase	Disorders of lipid and lipoprotein metabolism	3931	606967
LDLR	low density lipoprotein receptor	Disorders of lipid and lipoprotein metabolism	3949	606945
LIPC	lipase C, hepatic type	Disorders of lipid and lipoprotein metabolism	3990	151670
LPL	lipoprotein lipase	Disorders of lipid and lipoprotein metabolism	4023	609708
PNLIP	pancreatic lipase	Disorders of lipid and lipoprotein metabolism	5406	246600
ALG1	ALG1, chitobiosyldiphosphodolichol beta-mannosyltransferase	Congenital disorders of glycosylation and other disorders of protein modification	56052	605907
ALG12	ALG12, alpha-1,6-mannosyltransferase	Congenital disorders of glycosylation and other disorders of protein modification	79087	607144
ALG2	ALG2, alpha-1,3/1,6-mannosyltransferase	Congenital disorders of glycosylation and other disorders of protein modification	85365	607905
ALG3	ALG3, alpha-1,3- mannosyltransferase	Congenital disorders of glycosylation and other disorders of protein modification	10195	608750
ALG6	ALG6, alpha-1,3-glucosyltransferase	Congenital disorders of glycosylation and other disorders of protein modification	29929	604566
ALG8	ALG8, alpha-1,3-glucosyltransferase	Congenital disorders of glycosylation and other disorders of protein modification	79053	608103
ALG9	ALG9, alpha-1,2-mannosyltransferase	Congenital disorders of glycosylation and other disorders of protein modification	79796	606941
ATP6V0A2	ATPase H+ transporting V0 subunit a2	Congenital disorders of glycosylation and other disorders of protein modification	23545	611716
B3GLCT	beta 3-glucosyltransferase	Congenital disorders of glycosylation and other disorders of protein modification	145173	610308
B4GALT1	beta-1,4-galactosyltransferase 1	Congenital disorders of glycosylation and other disorders of protein modification	2683	137060
B4GALT7	beta-1,4-galactosyltransferase 7	Congenital disorders of glycosylation and other disorders of protein modification	11285	604327
COG1	component of oligomeric golgi complex 1	Congenital disorders of glycosylation and other disorders of protein modification	9382	606973
COG7	component of oligomeric golgi complex 7	Congenital disorders of glycosylation and other disorders of protein modification	91949	606978
COG8	component of oligomeric golgi complex 8	Congenital disorders of glycosylation and other disorders of protein modification	84342	606979
DPAGT1	dolichyl-phosphate N-acetylglucosaminephosphotransferase 1	Congenital disorders of glycosylation and other disorders of protein modification	1798	191350
DPM1	dolichyl-phosphate mannosyltransferase subunit 1, catalytic	Congenital disorders of glycosylation and other disorders of protein modification	8813	603503
EXT1	exostosin glycosyltransferase 1	Congenital disorders of glycosylation and other disorders of protein modification	2131	608177
EXT2	exostosin glycosyltransferase 2	Congenital disorders of glycosylation and other disorders of protein modification	2132	608210
FKRP	fukutin related protein	Congenital disorders of glycosylation and other disorders of protein modification	79147	606596
FKTN	fukutin	Congenital disorders of glycosylation and other disorders of protein modification	2218	607440
GALNT3	polypeptide N-acetylgalactosaminyltransferase 3	Congenital disorders of glycosylation and other disorders of protein modification	2591	601756
LARGE1	LARGE xylosyl- and glucuronyltransferase 1	Congenital disorders of glycosylation and other disorders of protein modification	9215	603590
LFNG	LFNG O-fucosylpeptide 3-beta-N-acetylglucosaminyltransferase	Congenital disorders of glycosylation and other disorders of protein modification	3955	602576
MGAT2	mannosyl (alpha-1,6-)-glycoprotein beta-1,2-N-acetylglucosaminyltransferase	Congenital disorders of glycosylation and other disorders of protein modification	4247	602616
MPI	mannose phosphate isomerase	Congenital disorders of glycosylation and other disorders of protein modification	4351	154550
PIGM	phosphatidylinositol glycan anchor biosynthesis class M	Congenital disorders of glycosylation and other disorders of protein modification	93183	610273
PMM2	phosphomannomutase 2	Congenital disorders of glycosylation and other disorders of protein modification	5373	601785
POMGNT1	protein O-linked mannose N-acetylglucosaminyltransferase 1 (beta 1,2-)	Congenital disorders of glycosylation and other disorders of protein modification	55624	606822
POMT1	protein O-mannosyltransferase 1	Congenital disorders of glycosylation and other disorders of protein modification	10585	607423
SLC35A1	solute carrier family 35 member A1	Congenital disorders of glycosylation and other disorders of protein modification	10559	605634
SLC35C1	solute carrier family 35 member C1	Congenital disorders of glycosylation and other disorders of protein modification	55343	605881
SLC35D1	solute carrier family 35 member D1	Congenital disorders of glycosylation and other disorders of protein modification	23169	610804
TUSC3	tumor suppressor candidate 3	Congenital disorders of glycosylation and other disorders of protein modification	7991	601385
AGA	aspartylglucosaminidase	Lysosomal disorders	175	613228
ARSA	arylsulfatase A	Lysosomal disorders	410	607574
ARSB	arylsulfatase B	Lysosomal disorders	411	611542
ASAH1	N-acylsphingosine amidohydrolase 1	Lysosomal disorders	427	613468
CLN3	CLN3, battenin	Lysosomal disorders	1201	607042
CLN5	ceroid-lipofuscinosis, neuronal 5	Lysosomal disorders	1203	608102
CLN6	ceroid-lipofuscinosis, neuronal 6, late infantile, variant	Lysosomal disorders	54982	606725
CLN8	ceroid-lipofuscinosis, neuronal 8	Lysosomal disorders	2055	607837
CLN9	ceroid-lipofuscinosis, neuronal 9	Lysosomal disorders	497231	609055
CTNS	cystinosin, lysosomal cystine transporter	Lysosomal disorders	1497	606272
CTSA	cathepsin A	Lysosomal disorders	5476	613111
CTSC	cathepsin C	Lysosomal disorders	1075	602365
CTSD	cathepsin D	Lysosomal disorders	1509	116840
CTSK	cathepsin K	Lysosomal disorders	1513	601105
DNAJC5	DnaJ heat shock protein family (Hsp40) member C5	Lysosomal disorders	80331	611203
FUCA1	fucosidase, alpha-L- 1, tissue	Lysosomal disorders	2517	612280
GALC	galactosylceramidase	Lysosomal disorders	2581	606890
GALNS	galactosamine (N-acetyl)-6-sulfatase	Lysosomal disorders	2588	612222
GBA	glucosylceramidase beta	Lysosomal disorders	2629	606463
GLA	galactosidase alpha	Lysosomal disorders	2717	300644
GLB1	galactosidase beta 1	Lysosomal disorders	2720	611458
GM2A	GM2 ganglioside activator	Lysosomal disorders	2760	613109
GNE	glucosamine (UDP-N-acetyl)-2-epimerase/N-acetylmannosamine kinase	Lysosomal disorders	10020	603824
GNPTAB	N-acetylglucosamine-1-phosphate transferase alpha and beta subunits	Lysosomal disorders	79158	607840
GNS	glucosamine (N-acetyl)-6-sulfatase	Lysosomal disorders	2799	607664
GUSB	glucuronidase beta	Lysosomal disorders	2990	611499
HEXA	hexosaminidase subunit alpha	Lysosomal disorders	3073	606869
HEXB	hexosaminidase subunit beta	Lysosomal disorders	3074	606873
HGSNAT	heparan-alpha-glucosaminide N-acetyltransferase	Lysosomal disorders	138050	610453
HPS1	HPS1, biogenesis of lysosomal organelles complex 3 subunit 1	Lysosomal disorders	3257	604982
HYAL1	hyaluronoglucosaminidase 1	Lysosomal disorders	3373	607071
IDS	iduronate 2-sulfatase	Lysosomal disorders	3423	300823
IDUA	iduronidase, alpha-L-	Lysosomal disorders	3425	252800
LAMP2	lysosomal associated membrane protein 2	Lysosomal disorders	3920	309060
LIPA	lipase A, lysosomal acid type	Lysosomal disorders	3988	613497
MAN2B1	mannosidase alpha class 2B member 1	Lysosomal disorders	4125	609458
MANBA	mannosidase beta	Lysosomal disorders	4126	609489
MCOLN1	mucolipin 1	Lysosomal disorders	57192	605248
NAGA	alpha-N-acetylgalactosaminidase	Lysosomal disorders	4668	104170
NAGLU	N-acetyl-alpha-glucosaminidase	Lysosomal disorders	4669	609701
NEU1	neuraminidase 1	Lysosomal disorders	4758	608272
NPC1	NPC intracellular cholesterol transporter 1	Lysosomal disorders	4864	607623
NPC2	NPC intracellular cholesterol transporter 2	Lysosomal disorders	10577	601015
PPT1	palmitoyl-protein thioesterase 1	Lysosomal disorders	5538	600722
PSAP	prosaposin	Lysosomal disorders	5660	176801
SGSH	N-sulfoglucosamine sulfohydrolase	Lysosomal disorders	6448	605270
SLC17A5	solute carrier family 17 member 5	Lysosomal disorders	26503	604322
SMPD1	sphingomyelin phosphodiesterase 1	Lysosomal disorders	6609	607608
SUMF1	sulfatase modifying factor 1	Lysosomal disorders	285362	607939
SYT16	synaptotagmin 16	Lysosomal disorders	83851	610950
TPP1	tripeptidyl peptidase 1	Lysosomal disorders	1200	607998
ABCD1	ATP binding cassette subfamily D member 1	Peroxisomal disorders	215	300371
ABCD2	ATP binding cassette subfamily D member 2	Peroxisomal disorders	225	601081
ACOX1	acyl-CoA oxidase 1	Peroxisomal disorders	51	609751
AGPS	alkylglycerone phosphate synthase	Peroxisomal disorders	8540	603051
AGXT	alanine-glyoxylate aminotransferase	Peroxisomal disorders	189	604285
AMACR	alpha-methylacyl-CoA racemase	Peroxisomal disorders	23600	604489
CAT	catalase	Peroxisomal disorders	847	115500
GNPAT	glyceronephosphate O-acyltransferase	Peroxisomal disorders	8443	602744
HSD17B4	hydroxysteroid 17-beta dehydrogenase 4	Peroxisomal disorders	3295	601860
PEX1	peroxisomal biogenesis factor 1	Peroxisomal disorders	5189	602136
PEX10	peroxisomal biogenesis factor 10	Peroxisomal disorders	5192	602859
PEX11B	peroxisomal biogenesis factor 11 beta	Peroxisomal disorders	8799	603867
PEX12	peroxisomal biogenesis factor 12	Peroxisomal disorders	5193	601758
PEX13	peroxisomal biogenesis factor 13	Peroxisomal disorders	5194	601789
PEX14	peroxisomal biogenesis factor 14	Peroxisomal disorders	5195	601791
PEX16	peroxisomal biogenesis factor 16	Peroxisomal disorders	9409	603360
PEX19	peroxisomal biogenesis factor 19	Peroxisomal disorders	5824	600279
PEX2	peroxisomal biogenesis factor 2	Peroxisomal disorders	5828	170993
PEX26	peroxisomal biogenesis factor 26	Peroxisomal disorders	55670	608666
PEX3	peroxisomal biogenesis factor 3	Peroxisomal disorders	8504	603164
PEX5	peroxisomal biogenesis factor 5	Peroxisomal disorders	5830	600414
PEX6	peroxisomal biogenesis factor 6	Peroxisomal disorders	5190	601498
PEX7	peroxisomal biogenesis factor 7	Peroxisomal disorders	5191	601757
PHYH	phytanoyl-CoA 2-hydroxylase	Peroxisomal disorders	5264	602026
ABAT	4-aminobutyrate aminotransferase	Disorders of neurotransmitter metabolism	18	137150
ALDH5A1	aldehyde dehydrogenase 5 family member A1	Disorders of neurotransmitter metabolism	7915	610045
DBH	dopamine beta-hydroxylase	Disorders of neurotransmitter metabolism	1621	609312
DDC	dopa decarboxylase	Disorders of neurotransmitter metabolism	1644	107930
TH	tyrosine hydroxylase	Disorders of neurotransmitter metabolism	7054	191290
ALDH7A1	aldehyde dehydrogenase 7 family member A1	Disorders in the metabolism of vitamins and (non-protein) cofactors	501	107323
AMN	amnion associated transmembrane protein	Disorders in the metabolism of vitamins and (non-protein) cofactors	81693	605799
BTD	biotinidase	Disorders in the metabolism of vitamins and (non-protein) cofactors	686	609019
CD320	CD320 molecule	Disorders in the metabolism of vitamins and (non-protein) cofactors	51293	606475
CUBN	cubilin	Disorders in the metabolism of vitamins and (non-protein) cofactors	8029	602997
FOLR1	folate receptor 1	Disorders in the metabolism of vitamins and (non-protein) cofactors	2348	136430
GCH1	GTP cyclohydrolase 1	Disorders in the metabolism of vitamins and (non-protein) cofactors	2643	600225
GIF	gastric intrinsic factor	Disorders in the metabolism of vitamins and (non-protein) cofactors	2694	609342
GPHN	gephyrin	Disorders in the metabolism of vitamins and (non-protein) cofactors	10243	603930
HLCS	holocarboxylase synthetase	Disorders in the metabolism of vitamins and (non-protein) cofactors	3141	609018
LMBRD1	LMBR1 domain containing 1	Disorders in the metabolism of vitamins and (non-protein) cofactors	55788	612625
MMAA	methylmalonic aciduria (cobalamin deficiency) cblA type	Disorders in the metabolism of vitamins and (non-protein) cofactors	166785	607481
MMAB	methylmalonic aciduria (cobalamin deficiency) cblB type	Disorders in the metabolism of vitamins and (non-protein) cofactors	326625	607568
MMACHC	methylmalonic aciduria (cobalamin deficiency) cblC type, with homocystinuria	Disorders in the metabolism of vitamins and (non-protein) cofactors	25974	609831
MOCS1	molybdenum cofactor synthesis 1	Disorders in the metabolism of vitamins and (non-protein) cofactors	4337	603707
MOCS2	molybdenum cofactor synthesis 2	Disorders in the metabolism of vitamins and (non-protein) cofactors	4338	603708
MTHFR	methylenetetrahydrofolate reductase	Disorders in the metabolism of vitamins and (non-protein) cofactors	4524	607093
NOTCH3	notch 3	Disorders in the metabolism of vitamins and (non-protein) cofactors	4854	600276
PANK2	pantothenate kinase 2	Disorders in the metabolism of vitamins and (non-protein) cofactors	80025	606157
PNPO	pyridoxamine 5'-phosphate oxidase	Disorders in the metabolism of vitamins and (non-protein) cofactors	55163	603287
PTS	6-pyruvoyltetrahydropterin synthase	Disorders in the metabolism of vitamins and (non-protein) cofactors	5805	612719
QDPR	quinoid dihydropteridine reductase	Disorders in the metabolism of vitamins and (non-protein) cofactors	5860	612676
RBP4	retinol binding protein 4	Disorders in the metabolism of vitamins and (non-protein) cofactors	5950	180250
SLC19A3	solute carrier family 19 member 3	Disorders in the metabolism of vitamins and (non-protein) cofactors	80704	606152
SLC25A19	solute carrier family 25 member 19	Disorders in the metabolism of vitamins and (non-protein) cofactors	60386	606521
SLC46A1	solute carrier family 46 member 1	Disorders in the metabolism of vitamins and (non-protein) cofactors	113235	611672
SPR	sepiapterin reductase (7,8-dihydrobiopterin:NADP+ oxidoreductase)	Disorders in the metabolism of vitamins and (non-protein) cofactors	6697	182125
TCN1	transcobalamin 1	Disorders in the metabolism of vitamins and (non-protein) cofactors	6947	189905
TCN2	transcobalamin 2	Disorders in the metabolism of vitamins and (non-protein) cofactors	6948	613441
TTPA	alpha tocopherol transfer protein	Disorders in the metabolism of vitamins and (non-protein) cofactors	7274	600415
VKORC1	vitamin K epoxide reductase complex subunit 1	Disorders in the metabolism of vitamins and (non-protein) cofactors	79001	608547
ALB	albumin	Disorders in the metabolism of trace elements and metals	213	103600
ATP7A	ATPase copper transporting alpha	Disorders in the metabolism of trace elements and metals	538	300011
ATP7B	ATPase copper transporting beta	Disorders in the metabolism of trace elements and metals	540	606882
BMP2	bone morphogenetic protein 2	Disorders in the metabolism of trace elements and metals	650	112261
SLC39A4	solute carrier family 39 member 4	Disorders in the metabolism of trace elements and metals	55630	607059
TRPM6	transient receptor potential cation channel subfamily M member 6	Disorders in the metabolism of trace elements and metals	140803	607009
FMO3	flavin containing monooxygenase 3	Disorders and variants in the metabolism of xenobiotics	2328	136132
